# Supplementary material
Source: PubMed Central journal article supplement (PMC3869892)
Supplement: NIHMS511297-supplement-supplement_1.pdf [file NIHMS511297-supplement-supplement_1.pdf]

**Legend**

**Figure 1.** Simplified Directed Acyclic Graph of relationship between childbearing and obesity, National Longitudinal Study of Adolescent Health, 1994/5-2008

**Table 1:** Descriptive characteristics of analysis sample by parity status, before and after matching by propensity scores, National Longitudinal Study of Adolescent Health, 1994-2008

**Table 2.** Differences in 7-year obesity incidence between incident parous and nulliparous women, before and after propensity-score matching, National Longitudinal Study of Adolescent Health, 1996-2008

**Table 3.** Differences in obesity prevalence between parous and nulliparous women, before and after propensity-score matching, National Longitudinal Study of Adolescent Health, wave 4 (2008)

**Supplemental Figure 1.** Histogram of propensity scores for incident parity between wave 2 and wave 3, National Longitudinal Study of Adolescent Health, 1996-2001

**Supplemental Figure 2.** Supplemental Figure 2: Histogram of propensity scores for prevalent parity at wave 4, National Longitudinal Study of Adolescent Health, 2008

Supplemental Figure 1: Histogram of propensity scores for incident parity between wave 2 and wave 3, National Longitudinal Study of Adolescent Health, 1996-2001

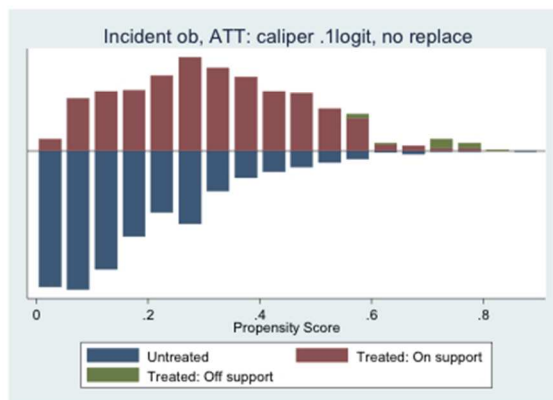

Histogram of propensity scores for incident parity between wave 2 and wave 3, National Longitudinal Study of Adolescent Health, 1996-2001  
254x190mm (72 x 72 DPI)

Supplemental Figure 2: Histogram of propensity scores for prevalent parity at wave 4, National Longitudinal Study of Adolescent Health, 2008

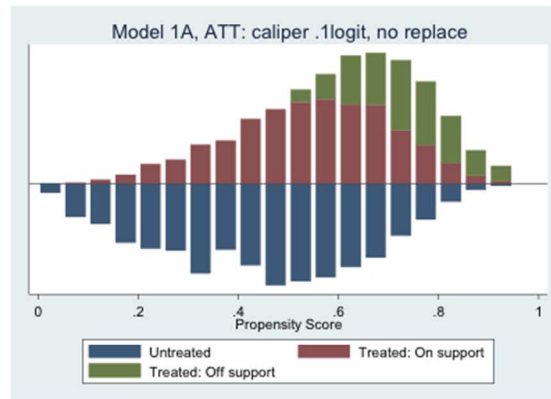

Histogram of propensity scores for prevalent parity at wave 4, National Longitudinal Study of Adolescent Health, 2008  
254x190mm (72 x 72 DPI)
